# Supplementary material for: High-resolution modelling of early contrail evolution from hydrogen-powered aircraft
Source: Copernicus journal article supplement (doi:10.5194/egusphere-2024-3859), 2025-01-17
Supplement: Supplementary file 1 [file egusphere-2024-3859-supplement.zip]

# Supplementary material to manuscript "High-resolution modelling of early contrail evolution from hydrogen-powered aircraft"

Annemarie Lottermoser and Simon Unterstrasser

Deutsches Zentrum für Luft- und Raumfahrt, Institut für Physik der Atmosphäre, Oberpfaffenhofen, Germany

**Correspondence:** Annemarie Lottermoser (annemarie.lottermoser@dlr.de)

## 1 Evaluation of $z_{\text{atm}}$ and $z_{\text{emit}}$

In the ice crystal loss parametrization, the two length scales  $z_{\text{atm}}$  and  $z_{\text{emit}}$  are implicitly defined. In the original version in U2016 (= Unterstrasser, 2016), the non-linear equations were solved using a numerical method (classical bisection method). To speed up evaluations and to provide explicit formulations, fit formulae for the two length scales  $z_{\text{atm}}$  and  $z_{\text{emit}}$  were derived as outlined in Sec. (A3) of this study. In order to compare both versions simulation-wise, the length scale values determined with the bisection method and the fit formulae are compared. Moreover, the corresponding survival fractions based on either evaluation method are calculated. The outcomes are provided in Tab. S1. As already summarized in the main text of the present study: "Applying the analytical relations to calculate the parametrized survival fraction, we observe no change in 44 % of the data points (when rounded to two digits, as done in Tab. A1) and a maximum deviation of 2.0 %. A detailed comparison is provided in Tab. S1."

## 2 Comparison of the original and new ice crystal loss parametrization

The original ice crystal loss parametrization proposed in U2016 has been implemented in several larger-scale contrail models to refine the contrail initialization in those models (Gruber et al., 2018; Bier and Burkhardt, 2022), and applications were confined to conventional kerosene contrails.

This section presents comparison plots between the original and updated version of the ice crystal loss parametrization. Figure S1 shows scatter plots of  $z_{\Delta}$  (panel (a)) and the parametrized survival fraction  $\hat{f}_{N,s}$  (panel (b)), with the  $x$ -axis representing the original (2016) values and the  $y$ -axis showing the updated (2025) data. The values of  $z_{\Delta}$  are similar across both formulations, although  $z_{\Delta,2025}$  is generally slightly lower. However, differences in  $z_{\Delta}$  should not be over-interpreted as this quantity serves as argument in an arctan-type function (see Eq. (12)) to retrieve the survival fraction. The arctan-type function formulation includes three fit coefficients that change from one to the other version. Hence, panel (b) shows the eventual differences in the parametrized survival fraction from the two versions. Likewise,  $\hat{f}_{N,s}$  exhibits only minor scatter between the two versions.

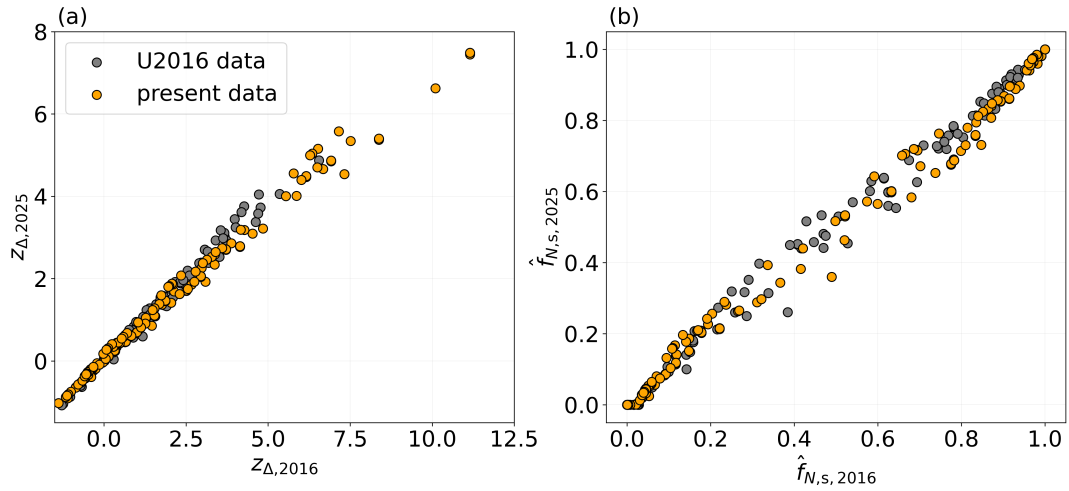

**Figure S1.** Scatter plot comparing the 2016  $z_{\Delta}$  values with the  $z_{\Delta}$  values from the present study (a), and a similar comparison for the parametrized survival fractions (b).

Furthermore, we reproduce plots that were shown in U2016 (Figs. 5, 9, and 10 in that publication). In the new versions of those plots (Figs. S2-S4 in this document), we juxtapose the outcome of the original and the new parametrization. This should demonstrate that the switch to the new formulation has only marginal implications on applications focusing on conventional kerosene contrails.

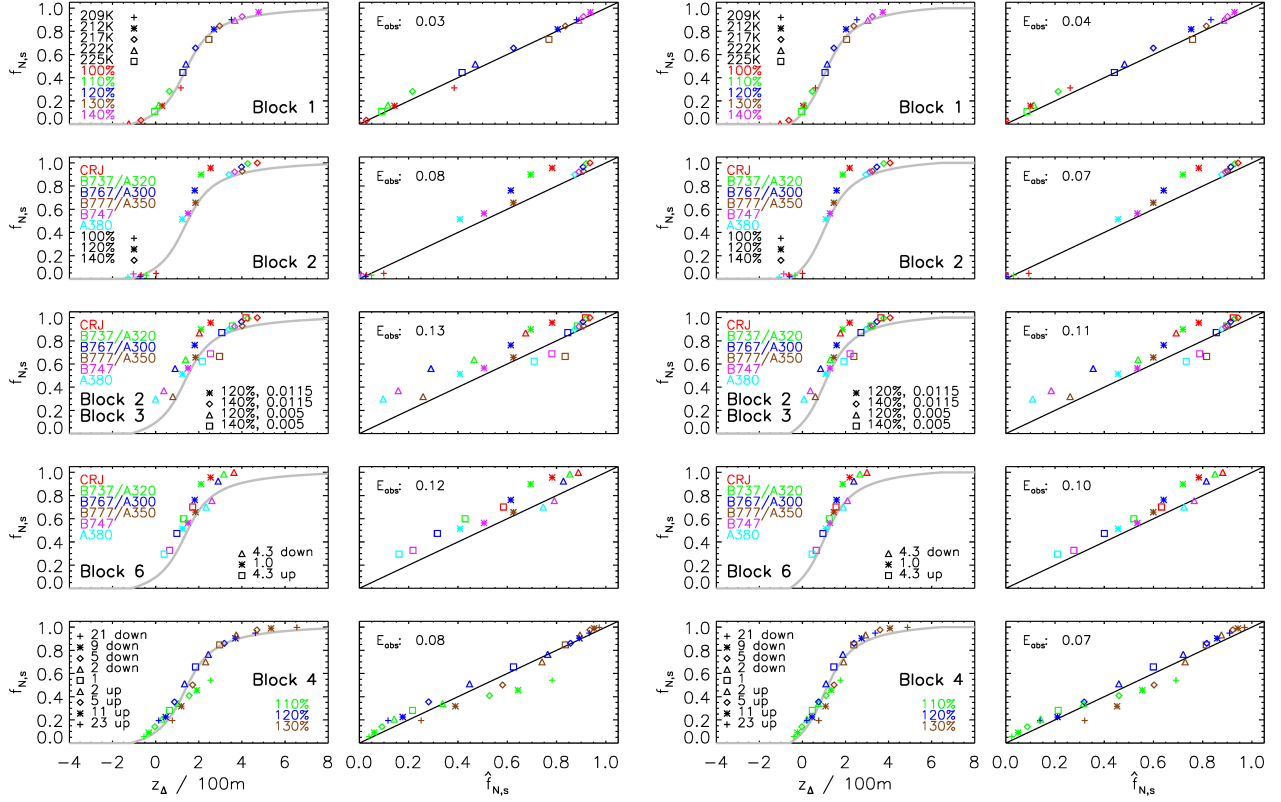

**Figure S2.** Reproduced version of Fig. 5 in U2016. The first two columns show the original plot from U2016. The third and fourth column use the parametrized survival fractions as obtained from the new parametrization version described in the present study.

Adapted figure caption of U2016:

*Columns 1 and 3: Relationship between simulated survival fraction  $f_{N,s}$  and  $z_{\Delta}$ . The grey curve shows the fit function  $\hat{a}$  as defined in Eq. (12) in the present study.*

*Columns 2 and 4: Relationship between simulated survival fraction  $f_{N,s}$  and approximated survival fraction  $\hat{f}_{N,s}$ . The black line shows the one-to-one line. Each row shows a subset of simulations taken from various simulation blocks defined in Table A2 of U2016. For example, the first row shows simulations of block 1, where  $RH_i$  and  $T_{CA}$  are varied. The legend in the plot provides a list of the symbols and colors, which uniquely define the simulations parameters of each plotted data point. The root mean square of the absolute error  $\hat{f}_{N,s} - f_{N,s}$  is denoted as  $E_{abs}$  and given for each subset.*

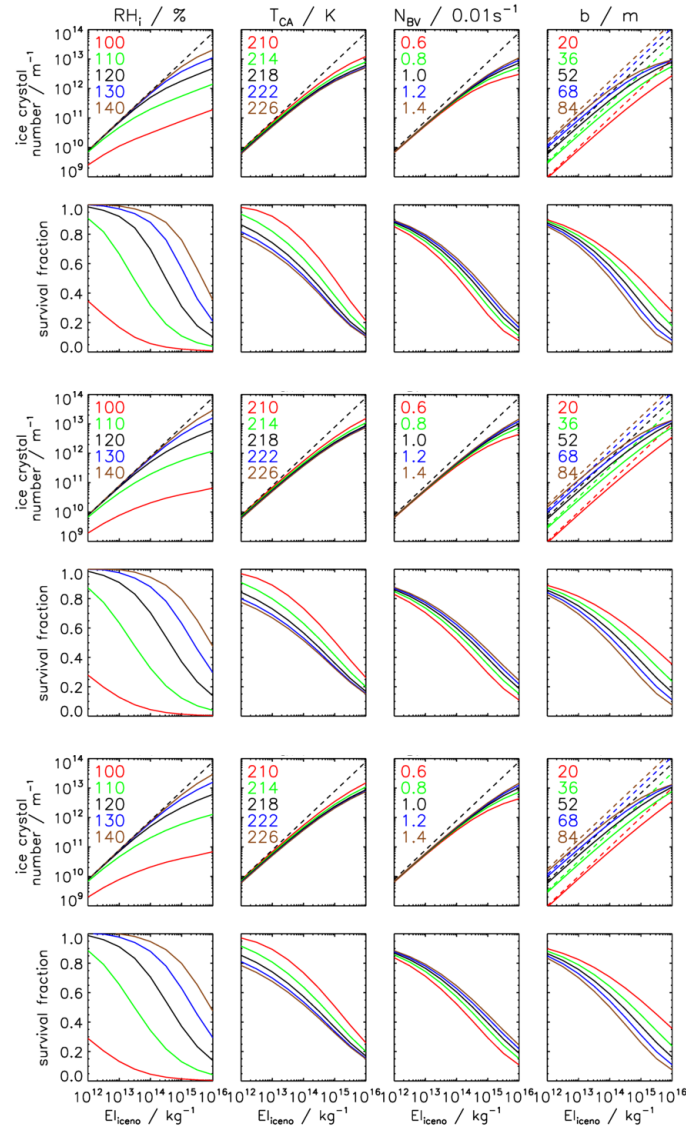

**Figure S3.** Reproduced version of Fig. 9 in U2016. The first two rows show the original plot from U2016. The other rows use the parametrized survival fractions as obtained from the new parametrization version described in the present study evaluating  $z_{\text{atm}}$  and  $z_{\text{emit}}$  either via bisection (rows 3&4) or by employing the fit functions (rows 5&6).

Adapted figure caption of U2016:

*Sensitivity of ice crystal loss to  $El_{\text{ice}}$  for various values of  $RH_i$ ,  $T$ ,  $N_{BV}$ , and  $b$  (from left to right). See legend for the color coding. Rows 1, 3, and 5: Ice crystal number per meter of flight path before and after the vortex phase (dashed and solid curves). Note that the initial ice crystal number depends only on  $b$  and  $El_{\text{ice}}$  (following Eq. (A10) in U2016, which assumes a water vapor emission index of 1.25 kg/kg). Hence, only one dashed curve is shown in the columns for  $RH_i$ ,  $T$ , and  $N_{BV}$ , respectively. Rows 2, 4, and 6: Survival fraction.*

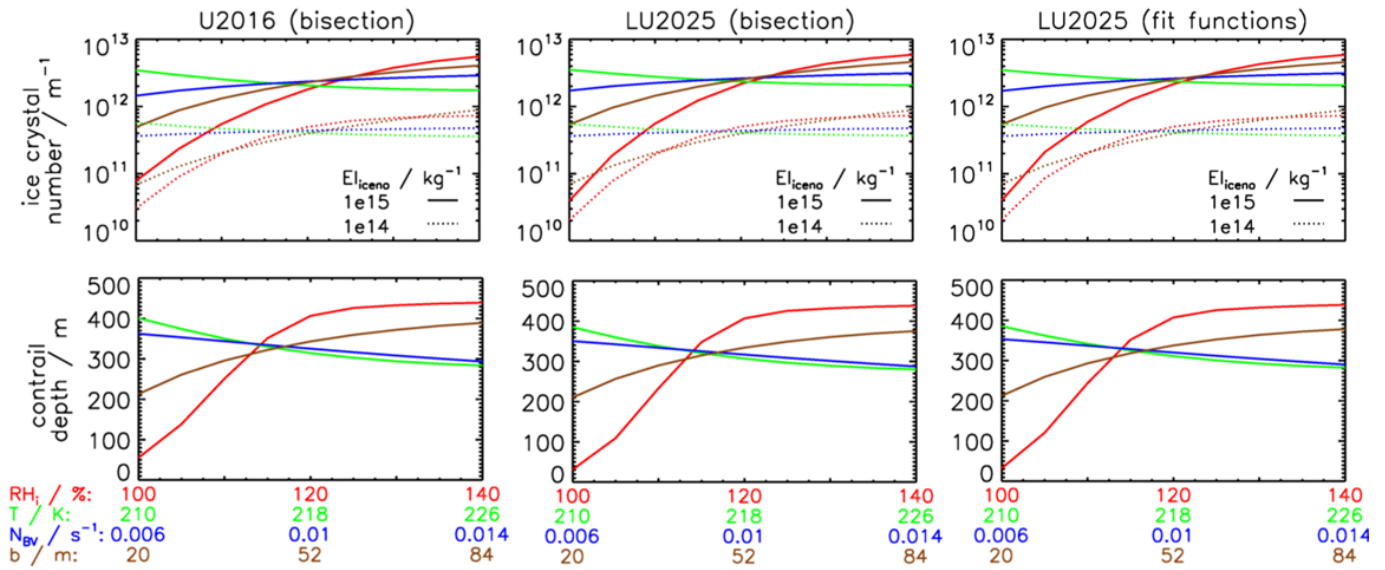

**Figure S4.** Reproduced version of Fig. 10 in U2016. The first column show the original plot from U2016. The two other columns use the new parametrization version (for both types of  $z_{atm}$  and  $z_{emit}$ ).

Adapted figure caption of U2016:

*Ice crystal number per meter of flight path (top) and contrail depth (bottom) after the vortex phase as a function of  $RH_i$ ,  $T$ ,  $N_{BV}$ , or  $b$ .  $EI_{ice}$  is  $10^{15}$  or  $10^{14} \text{ kg}^{-1}$ . The contrail depth parametrization does not depend on  $EI_{ice}$ . Note that the parametrization of the contrail depth  $H$  was not updated in the present study. The slightly different results come from the fact that the parametrization of  $H$  uses the parametrized  $f_{N,s}$  value as input. Note that the original plot in U2016 showed an additional panel with ice crystal number concentrations, which is left out here.*

## References

- Bier, A. and Burkhardt, U.: Impact of Parametrizing Microphysical Processes in the Jet and Vortex Phase on Contrail Cirrus Properties and Radiative Forcing, *J. Geophys. Res.*, 127, e2022JD036 677, <https://doi.org/10.1029/2022JD036677>, 2022.
- 30 Gruber, S., Unterstrasser, S., Bechtold, J., Vogel, H., Jung, M., Pak, H., and Vogel, B.: Contrails and their impact on shortwave radiation and photovoltaic power production – a regional model study, *Atmos. Chem. Phys.*, 18, 6393–6411, <https://doi.org/10.5194/acp-18-6393-2018>, 2018.
- Unterstrasser, S.: Properties of young contrails - a parametrisation based on large-eddy simulations, *Atmos. Chem. Phys.*, 16, 2059–2082, <https://doi.org/10.5194/acp-16-2059-2016>, 2016.

| Nr                                         | $\hat{f}_{N,s}$                  | $\tilde{f}_{N,s}$                 | $z_{\text{atm}}$ | $\tilde{z}_{\text{atm}} / \text{m}$ | $z_{\text{emit}} / \text{m}$ | $\tilde{z}_{\text{emit}} / \text{m}$ |
|--------------------------------------------|----------------------------------|-----------------------------------|------------------|-------------------------------------|------------------------------|--------------------------------------|
| 1,2,3,4,5                                  | 0.06, 0.23, 0.6, 0.87, 0.97      | 0.05, 0.21, 0.59, 0.87, 0.98      | 164              | 163                                 | 249                          | 250                                  |
| 6,7,8,9,10                                 | 0.0, 0.06, 0.22, 0.58, 0.86      | 0.0, 0.05, 0.22, 0.59, 0.87       | 85               | 87                                  | 249                          | 250                                  |
| 11,12,13,14,15,16                          | 0.05, 0.2, 0.57, 0.85, 0.96, 1.0 | 0.05, 0.19, 0.55, 0.86, 0.97, 1.0 | 164              | 163                                 | 546                          | 541                                  |
| 17,18,19,20,21                             | 0.08, 0.29, 0.68, 0.9, 0.98      | 0.08, 0.28, 0.68, 0.91, 0.99      | 85               | 87                                  | 546                          | 541                                  |
| 22,23,24                                   | 0.06, 0.6, 0.97                  | 0.05, 0.59, 0.98                  | 164              | 163                                 | 249                          | 250                                  |
| 25,26,27                                   | 0.06, 0.6, 0.97                  | 0.05, 0.59, 0.98                  | 164              | 163                                 | 249                          | 250                                  |
| 28,29,30                                   | 0.0, 0.21, 0.86                  | 0.0, 0.21, 0.87                   | 85               | 87                                  | 249                          | 250                                  |
| 31,32,33                                   | 0.0, 0.22, 0.86                  | 0.0, 0.22, 0.87                   | 85               | 87                                  | 249                          | 250                                  |
| 34,35,36                                   | 0.2, 0.85, 1.0                   | 0.19, 0.85, 1.0                   | 164              | 163                                 | 546                          | 541                                  |
| 37,38,39                                   | 0.2, 0.85, 1.0                   | 0.19, 0.86, 1.0                   | 164              | 163                                 | 546                          | 541                                  |
| 40,41,42                                   | 0.08, 0.68, 0.98                 | 0.08, 0.68, 0.99                  | 85               | 87                                  | 546                          | 541                                  |
| 43,44,45                                   | 0.08, 0.68, 0.98                 | 0.08, 0.68, 0.99                  | 85               | 87                                  | 546                          | 541                                  |
| 46,47,48                                   | 0.0, 0.26, 0.94                  | 0.0, 0.25, 0.95                   | 164              | 163                                 | 249                          | 250                                  |
| 49,50,51                                   | 0.0, 0.02, 0.73                  | 0.0, 0.02, 0.74                   | 85               | 87                                  | 249                          | 250                                  |
| 52,53,54                                   | 0.02, 0.71, 1.0                  | 0.01, 0.7, 1.0                    | 164              | 163                                 | 546                          | 541                                  |
| 55,56,57                                   | 0.0, 0.36, 0.96                  | 0.0, 0.35, 0.97                   | 85               | 87                                  | 546                          | 541                                  |
| Simulations at higher ambient temperatures |                                  |                                   |                  |                                     |                              |                                      |
| 58,59,60,61,62                             | 0.03, 0.14, 0.44, 0.79, 0.94     | 0.02, 0.13, 0.43, 0.8, 0.95       | 177              | 176                                 | 110                          | 112                                  |
| 63,64,65,66,67                             | 0.0, 0.01, 0.09, 0.3, 0.69       | 0.0, 0.0, 0.09, 0.31, 0.7         | 92               | 95                                  | 110                          | 112                                  |
| 68,69,70,71,72                             | 0.08, 0.28, 0.67, 0.9, 0.98      | 0.07, 0.27, 0.67, 0.9, 0.99       | 177              | 176                                 | 262                          | 263                                  |
| 73,74,75,76,77                             | 0.0, 0.07, 0.27, 0.65, 0.89      | 0.0, 0.07, 0.27, 0.66, 0.9        | 92               | 95                                  | 262                          | 263                                  |
| 78,79,80,81,82                             | 0.05, 0.21, 0.57, 0.86, 0.97     | 0.05, 0.2, 0.56, 0.86, 0.97       | 186              | 185                                 | 163                          | 163                                  |
| 83,84,85,86,87                             | 0.0, 0.03, 0.15, 0.46, 0.81      | 0.0, 0.03, 0.15, 0.47, 0.82       | 97               | 99                                  | 163                          | 163                                  |
| 88,89,90,91,92                             | 0.05, 0.19, 0.53, 0.84, 0.96     | 0.04, 0.17, 0.52, 0.84, 0.96      | 191              | 191                                 | 123                          | 121                                  |
| 93,94,95,96,97                             | 0.0, 0.02, 0.12, 0.38, 0.76      | 0.0, 0.02, 0.12, 0.39, 0.77       | 99               | 102                                 | 123                          | 121                                  |
| 98,99,100                                  | 0.04, 0.53, 0.96                 | 0.04, 0.52, 0.96                  | 191              | 191                                 | 123                          | 121                                  |
| 101,102,103                                | 0.05, 0.53, 0.96                 | 0.04, 0.52, 0.97                  | 191              | 191                                 | 123                          | 121                                  |
| 104,105,106                                | 0.0, 0.12, 0.76                  | 0.0, 0.12, 0.77                   | 99               | 102                                 | 123                          | 121                                  |
| 107,108,109                                | 0.0, 0.12, 0.76                  | 0.0, 0.12, 0.77                   | 99               | 102                                 | 123                          | 121                                  |
| 110,111,112,113,114                        | 0.04, 0.18, 0.52, 0.83, 0.96     | 0.04, 0.16, 0.5, 0.83, 0.96       | 195              | 194                                 | 102                          | 99                                   |
| 115,116,117,118,119                        | 0.0, 0.01, 0.1, 0.34, 0.73       | 0.0, 0.01, 0.1, 0.35, 0.74        | 101              | 104                                 | 102                          | 99                                   |
| Simulations with A320/B737-like aircraft   |                                  |                                   |                  |                                     |                              |                                      |
| 120                                        | 0.72                             | 0.72                              | 164              | 163                                 | 176                          | 183                                  |
| 121,122,123                                | 0.13, 0.64, 0.96                 | 0.12, 0.64, 0.97                  | 177              | 176                                 | 76                           | 79                                   |
| 124,125,126                                | 0.03, 0.21, 0.78                 | 0.03, 0.21, 0.8                   | 92               | 95                                  | 76                           | 79                                   |
| 127,128,129                                | 0.2, 0.76, 0.99                  | 0.19, 0.76, 0.99                  | 177              | 176                                 | 185                          | 186                                  |
| 130,131,132                                | 0.07, 0.39, 0.9                  | 0.06, 0.4, 0.91                   | 92               | 95                                  | 185                          | 186                                  |
| 133,134,135                                | 0.17, 0.72, 0.98                 | 0.16, 0.72, 0.98                  | 186              | 185                                 | 114                          | 113                                  |
| 136,137,138                                | 0.04, 0.29, 0.85                 | 0.04, 0.29, 0.86                  | 186              | 185                                 | 114                          | 113                                  |
| 139,140,141                                | 0.16, 0.71, 0.97                 | 0.15, 0.7, 0.98                   | 191              | 191                                 | 85                           | 83                                   |
| 142,143,144                                | 0.04, 0.26, 0.82                 | 0.03, 0.26, 0.83                  | 99               | 102                                 | 85                           | 83                                   |
| 145,146,147                                | 0.16, 0.7, 0.97                  | 0.15, 0.69, 0.98                  | 195              | 194                                 | 70                           | 67                                   |
| 148,149,150                                | 0.03, 0.24, 0.81                 | 0.03, 0.24, 0.82                  | 101              | 104                                 | 70                           | 67                                   |

**Table S1.** List of parametrized survival fractions derived with length scales that are computed via the numerical (Eqs. (6) and (7)) or the analytical method (Eqs. (A2) and (A3)), denoted with a tilde, and the corresponding length scales. Rows with three, five, or six simulations correspond to sets where the  $N_0$ -scaling factors 100, 1, 0.01; 100, 10, 1, 0.1, 0.01; or 100, 100, 10, 1, 0.1, 0.01 are applied, respectively.
